# Supplementary material for: Update of a biogeochemical model with process-based algorithms to predict ammonia volatilization from fertilized cultivated uplands and rice paddy fields
Source: Copernicus journal article supplement (doi:10.5194/bg-19-3001-2022), 2022-06-22
Supplement: Supplementary file 1 [file bg-19-3001-2022-supplement.zip]

**Table S3** The deviation derived from the different simulation time steps.

| Time step: 1 day                         |                                  | Time step: 3 hours                  |                                      |
|------------------------------------------|----------------------------------|-------------------------------------|--------------------------------------|
| Daily reaction rate: $r_d$               |                                  | 3-hour reaction rate: $r_d/8$       |                                      |
| Time                                     | Substrate concentration          | Time                                | Substrate concentration              |
| $t_0$                                    | $c_0$                            | $t_0$                               | $c_0$                                |
| <b><math>t_1</math> (1 day=24 hours)</b> | <b><math>c_0(1 - r_d)</math></b> | $t_1'$ (3 hours)                    | $c_0(1 - r_d/8)$                     |
|                                          |                                  | $t_2'$ (6 hours)                    | $c_0(1 - r_d/8)^2$                   |
|                                          |                                  | $t_3'$ (9 hours)                    | $c_0(1 - r_d/8)^3$                   |
|                                          |                                  | $t_4'$ (12 hours)                   | $c_0(1 - r_d/8)^4$                   |
|                                          |                                  | $t_5'$ (15 hours)                   | $c_0(1 - r_d/8)^5$                   |
|                                          |                                  | $t_6'$ (18 hours)                   | $c_0(1 - r_d/8)^6$                   |
|                                          |                                  | $t_7'$ (21 hours)                   | $c_0(1 - r_d/8)^7$                   |
|                                          |                                  | <b><math>t_8'</math> (24 hours)</b> | <b><math>c_0(1 - r_d/8)^8</math></b> |

At the moment of 24 hours, the deviation between the simulated substrate concentration using daily and 3-hour time step:  $[c_0(1 - r_d)] - [c_0(1 - r_d/8)^8]$ , i.e.,  **$c_0[1 - r_d - (1 - r_d/8)^8]$**

$c_0$  denotes the initial concentration of a substrate.
