# Supplementary material for: Update of a biogeochemical model with process-based algorithms to predict ammonia volatilization from fertilized cultivated uplands and rice paddy fields
Source: Copernicus journal article supplement (doi:10.5194/bg-19-3001-2022), 2022-06-22
Supplement: Supplementary file 3 [file bg-19-3001-2022-supplement.zip]

**Table S2** Descriptions and units of the symbols used in Table S1.

| Symbol                              | Description                                           | Unit                           |
|-------------------------------------|-------------------------------------------------------|--------------------------------|
| [urea]                              | Concentration of urea                                 | kg N ha <sup>-1</sup>          |
| [NH <sub>4</sub> <sup>+</sup> ]     | Concentration of ammonium                             | kg N ha <sup>-1</sup>          |
| [NH <sub>3(l)</sub> ]               | Concentration of NH <sub>3</sub> in soil liquid phase | kg N ha <sup>-1</sup>          |
| [NH <sub>4</sub> HCO <sub>3</sub> ] | Concentration of NH <sub>4</sub> HCO <sub>3</sub>     | kg N ha <sup>-1</sup>          |
| [SOC]                               | Concentration of soil organic carbon                  | kg C kg soil <sup>-1</sup>     |
| WFPS                                | Soil moisture                                         | volume fraction, dimensionless |
| PORE                                | Soil porosity                                         | volume fraction, dimensionless |
| $T_{\text{soil}}$                   | Soil temperature                                      | °C                             |
| pH                                  | Soil pH                                               | —                              |
| $S_{\text{wind}}$                   | Wind speed                                            | m s <sup>-1</sup>              |
| lai                                 | Leaf area index                                       | m <sup>2</sup> m <sup>-2</sup> |
| cl                                  | Soil clay fraction                                    | %                              |
| $P$                                 | Precipitation                                         | cm                             |
| $d_s$                               | Depth of the simulated soil profile                   | m                              |
| $d_l$                               | Thickness of each soil layer                          | m                              |
| $d_{\text{soil}}$                   | Simulated soil depth                                  | m                              |
| $d_t$                               | Time step of simulation                               | 1 day or 3 hours               |
| $j$                                 | the $j$ th soil layer                                 | —                              |
| $q$                                 | Total soil layer number                               | —                              |
