# Supplementary material for: Update of a biogeochemical model with process-based algorithms to predict ammonia volatilization from fertilized cultivated uplands and rice paddy fields
Source: Copernicus journal article supplement (doi:10.5194/bg-19-3001-2022), 2022-06-22
Supplement: Supplementary file 4 [file bg-19-3001-2022-supplement.zip]

**Table S6** Surface soil properties for model operation.

| Site name <sup>a</sup>                              | CS <sup>c</sup> | DY <sup>d</sup> | FQP <sup>e</sup> | SZ <sup>f</sup> | YTA <sup>g</sup> |
|-----------------------------------------------------|-----------------|-----------------|------------------|-----------------|------------------|
| Soil Texture <sup>b</sup>                           | L               | SC              | SL               | L               | L                |
| Bulk density (g cm <sup>-3</sup> )                  | 1.04            | 1.18            | 1.45             | 1.12            | 1.16             |
| Clay (%)                                            | 20.6            | 42.3            | 10.0             | 19.5            | 18.0             |
| Sand (%)                                            | 42.4            | 34.8            | 52.0             | 41.0            | 19.2             |
| pH                                                  | 7.1             | 5.4             | 8.8              | 6.1             | 5.8              |
| Soil organic carbon content (g C kg <sup>-1</sup> ) | 25.5            | 17.0            | 4.9              | 20.8            | 18.0             |

<sup>a</sup> The sites are Changshu (CS), Danyang (DY), Fengqiu with rice paddy fields (FQP), Shenzhen (SZ), and Yingtian (YTA).

<sup>b</sup> The soil textures are loam (L), sandy clay (SC) and sandy loam (SL).

<sup>c</sup> Clay and sand fractions: 0–30 cm, cited from the Second National Soil Survey data (10×10 km<sup>2</sup> grid) provided by the Institute of Soil Science, Chinese Academy of Sciences (SNSS); Soil pH: 0–20 cm, observed (Song et al., 2004); Soil organic carbon content (SOC): 0–20 cm, estimated from the observed soil organic matter content divided by 1.724; Bulk density (BD): 0–20 cm, estimated from SOC using the algorithm in Li (2016).

<sup>d</sup> Clay fraction and soil pH: topsoil, observed (Cai et al., 1986); Sand fraction: 0–30 cm, SNSS; SOC: topsoil, estimated from the observed organic nitrogen (ON) multiplied by 10; BD: topsoil, estimated from SOC using the algorithm in Li (2016).

<sup>e</sup> Clay fraction and soil pH: topsoil, observed (Zhu et al., 1989); Sand fractions: 0–30 cm, SNSS; SOC: 0–15 cm, estimated from the observed ON multiplied by 10; BD: 0–15 cm, estimated from SOC using the algorithm in Li (2016).

<sup>f</sup> Clay and sand fractions: 0–30 cm, SNSS; SOC and soil pH: 0–30 cm, observed (Gong et al., 2013); BD: 0–30 cm, estimated from SOC using the algorithm in Li (2016).

<sup>g</sup> Clay fraction and soil pH: topsoil, observed (Cai et al., 1992); Sand fraction: 0–30 cm, SNSS; SOC: 0–15 cm, estimated from the observed ON multiplied by 10; BD: 0–15 cm, estimated from SOC using the algorithm in Li (2016).
