# Supplementary material for: Update of a biogeochemical model with process-based algorithms to predict ammonia volatilization from fertilized cultivated uplands and rice paddy fields
Source: Copernicus journal article supplement (doi:10.5194/bg-19-3001-2022), 2022-06-22
Supplement: Supplementary file 7 [file bg-19-3001-2022-supplement.zip]

**Table S7** Agricultural management practices in the rice paddy field experiments wherein ammonia volatilizations were observed. <sup>a</sup>

| Site  | Crop  | Case code              | Date                                                                  | Field operation, method and amount for addition of nitrogen/water, or tillage depth <sup>b</sup>                                                                                                                                                |                                                                                                                                                                                                                                    |
|-------|-------|------------------------|-----------------------------------------------------------------------|-------------------------------------------------------------------------------------------------------------------------------------------------------------------------------------------------------------------------------------------------|------------------------------------------------------------------------------------------------------------------------------------------------------------------------------------------------------------------------------------|
| CS    | Rice  | P3, P4                 | 2002/6/22                                                             | Rice sowing;<br>P3: Fertilization (surface broadcasting: urea, 40.5 kg N ha <sup>-1</sup> for the low-nitrogen treatment (LN))<br>P4: Fertilization (surface broadcasting: urea, 81 kg N ha <sup>-1</sup> for the high-nitrogen treatment (HN)) |                                                                                                                                                                                                                                    |
|       |       |                        |                                                                       | P5, P6                                                                                                                                                                                                                                          | 2002/7/20                                                                                                                                                                                                                          |
|       |       | P7, P8                 | 2002/8/20                                                             |                                                                                                                                                                                                                                                 |                                                                                                                                                                                                                                    |
|       | Wheat |                        |                                                                       |                                                                                                                                                                                                                                                 | 2002/6/22–9.25                                                                                                                                                                                                                     |
|       |       |                        | 2002/9/25                                                             | Rice harvest                                                                                                                                                                                                                                    |                                                                                                                                                                                                                                    |
|       |       |                        | 2002/10/29                                                            | Wheat sowing                                                                                                                                                                                                                                    |                                                                                                                                                                                                                                    |
|       |       |                        | 2002/12/3 <sup>c</sup>                                                | Fertilization (surface broadcasting: urea, 81 kg N ha <sup>-1</sup> ) for LN<br>Fertilization (surface broadcasting: urea, 135 kg N ha <sup>-1</sup> ) for HN                                                                                   |                                                                                                                                                                                                                                    |
|       | DY    | Rice                   | P1, P9                                                                | 2003/2/21 <sup>c</sup>                                                                                                                                                                                                                          | Fertilization (surface broadcasting: urea, 54 kg N ha <sup>-1</sup> ) for LN<br>Fertilization (surface broadcasting: urea, 90 kg N ha <sup>-1</sup> ) for HN                                                                       |
|       |       |                        |                                                                       | 2003/6/5                                                                                                                                                                                                                                        | Wheat harvest                                                                                                                                                                                                                      |
|       |       |                        |                                                                       | 1984/6/20                                                                                                                                                                                                                                       | P1: Fertilization (surface broadcasting: ammonium bicarbonate, 90 kg N ha <sup>-1</sup> ), tillage (approximately 5 cm)<br>P9: Fertilization (surface broadcasting: urea, 90 kg N ha <sup>-1</sup> ), tillage (approximately 5 cm) |
| Wheat |       |                        | 1984/6/20                                                             | Rice sowing                                                                                                                                                                                                                                     |                                                                                                                                                                                                                                    |
|       |       |                        | 1984/6/20–9.25                                                        | Under the flooded condition, WT: approximately 5 cm                                                                                                                                                                                             |                                                                                                                                                                                                                                    |
|       |       |                        | 1984/9/25                                                             | Rice harvest                                                                                                                                                                                                                                    |                                                                                                                                                                                                                                    |
|       |       |                        | 1984/10/29                                                            | Wheat sowing                                                                                                                                                                                                                                    |                                                                                                                                                                                                                                    |
|       |       | 1985/3/24 <sup>c</sup> | Fertilization (surface broadcasting: urea, 90 kg N ha <sup>-1</sup> ) |                                                                                                                                                                                                                                                 |                                                                                                                                                                                                                                    |
|       |       | 1985/6/5               | Wheat harvest                                                         |                                                                                                                                                                                                                                                 |                                                                                                                                                                                                                                    |

|                |                        |                 |                        |                                                                                                                                                                                                                                                     |                                                                                                                                                                                      |
|----------------|------------------------|-----------------|------------------------|-----------------------------------------------------------------------------------------------------------------------------------------------------------------------------------------------------------------------------------------------------|--------------------------------------------------------------------------------------------------------------------------------------------------------------------------------------|
| FQP            | Rice                   | P2, P10         | 1986/6/21              | Rice sowing;<br>P2: Fertilization (surface broadcasting: ammonium bicarbonate, 90 kg N ha <sup>-1</sup> ), tillage (approximately 5 cm)<br>P10: Fertilization (surface broadcasting: urea, 90 kg N ha <sup>-1</sup> ), tillage (approximately 5 cm) |                                                                                                                                                                                      |
|                |                        |                 | 1986/6/21–9.5          | Under the flooded condition, WT: approximately 4 cm                                                                                                                                                                                                 |                                                                                                                                                                                      |
|                |                        |                 | 1986/9/5               | Rice harvest                                                                                                                                                                                                                                        |                                                                                                                                                                                      |
|                | Wheat                  |                 | 1986/10/29             | Wheat sowing                                                                                                                                                                                                                                        |                                                                                                                                                                                      |
|                |                        |                 | 1987/3/24 <sup>c</sup> | Fertilization (surface broadcasting: urea, 90 kg N ha <sup>-1</sup> )                                                                                                                                                                               |                                                                                                                                                                                      |
|                |                        |                 | 1987/6/5               | Wheat harvest                                                                                                                                                                                                                                       |                                                                                                                                                                                      |
|                | SZ                     | Rice            |                        | 2010/5/10                                                                                                                                                                                                                                           | Rice sowing                                                                                                                                                                          |
| 2010/5/10–7.20 |                        |                 |                        | Under the flooded condition, WT: approximately <u>7.5</u> cm                                                                                                                                                                                        |                                                                                                                                                                                      |
| P11, P12       |                        |                 |                        | 2010/5/16                                                                                                                                                                                                                                           | P11 (Treat5–1): Fertilization (surface broadcasting: urea, 162.2 kg N ha <sup>-1</sup> )<br>P12 (Treat5–2): Fertilization (surface broadcasting: urea, 162.2 kg N ha <sup>-1</sup> ) |
|                |                        | P13, P14        | 2010/6/22              | P13 (Treat6–1): Fertilization (surface broadcasting: urea, 40.9 kg N ha <sup>-1</sup> )<br>P14 (Treat6–2): Fertilization (surface broadcasting: urea, 81.8 kg N ha <sup>-1</sup> )                                                                  |                                                                                                                                                                                      |
| Rice           |                        |                 |                        | 2010/7/20                                                                                                                                                                                                                                           | Rice harvest                                                                                                                                                                         |
|                |                        | 2010/7/25       |                        | Rice sowing                                                                                                                                                                                                                                         |                                                                                                                                                                                      |
|                |                        | 2010/7/25–10.20 |                        | Under the flooded condition(water table approximately <u>7.5</u> cm)                                                                                                                                                                                |                                                                                                                                                                                      |
|                |                        | P15, P16        |                        | 2010/7/31                                                                                                                                                                                                                                           | P15 (Treat7–1): Fertilization (surface broadcasting: urea, 40.9 kg N ha <sup>-1</sup> )<br>P16 (Treat7–2): Fertilization (surface broadcasting: urea, 40.9 kg N ha <sup>-1</sup> )   |
|                |                        |                 |                        | P17, P18                                                                                                                                                                                                                                            | 2010/8/26                                                                                                                                                                            |
| YTA            |                        | Rice            |                        |                                                                                                                                                                                                                                                     | 2010/10/20                                                                                                                                                                           |
|                | 1992/4/10 <sup>c</sup> |                 |                        | Fertilization (surface broadcasting: urea, 90 kg N ha <sup>-1</sup> ), rice sowing                                                                                                                                                                  |                                                                                                                                                                                      |
|                | 1992/4/10–7.10         |                 |                        | Under the flooded condition, WT: approximately 2 cm                                                                                                                                                                                                 |                                                                                                                                                                                      |
|                | Rice                   | P19             | 1992/7/10              | Rice harvest                                                                                                                                                                                                                                        |                                                                                                                                                                                      |
|                |                        |                 | 1992/7/29              | Rice sowing, fertilization (surface broadcasting: urea, 90 kg N ha <sup>-1</sup> ), tillage (approximately 5 cm)                                                                                                                                    |                                                                                                                                                                                      |

|                 |                                                     |
|-----------------|-----------------------------------------------------|
| 1992/7/29–11.10 | Under the flooded condition, WT: approximately 2 cm |
| 1992/11/10      | Rice harvest                                        |

<sup>a</sup> Given information was used, alone with other model inputs as the primary drivers, to operate CNMM-DNDC simulation of ammonia volatilizations following individual fertilizer amendment events in the rice paddy cases (P1–19). The sites are Changshu (CS), Danyang (DY), Fengqiu with rice paddy fields (FQP), Shenzhen (SZ), and Yingtan (YTA).

<sup>b</sup> The italic and underlined numbers are the depths of the flooded water table that were arbitrarily set in this study by referring to those of the croplands adjacent to the experimental sites or model calibration since the information was not presented in the original literature.
