# Supplementary material for: Update of a biogeochemical model with process-based algorithms to predict ammonia volatilization from fertilized cultivated uplands and rice paddy fields
Source: Copernicus journal article supplement (doi:10.5194/bg-19-3001-2022), 2022-06-22
Supplement: Supplementary file 8 [file bg-19-3001-2022-supplement.zip › bg-19-3001-2022-supplement-title-page.pdf]

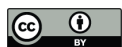

## *Supplement of*

# **Update of a biogeochemical model with process-based algorithms to predict ammonia volatilization from fertilized cultivated uplands and rice paddy fields**

**Siqi Li et al.**

*Correspondence to:* Xunhua Zheng (xunhua.zheng@post.iap.ac.cn) and Yong Li (yli@mail.iap.ac.cn)

- bg-19-3001-2022-supplement-title-page.pdf
- Fig. S1.pdf
- Fig. S2.pdf
- Table S1.pdf
- Table S2.pdf
- Table S3.pdf
- Table S4.pdf
- Table S5.pdf
- Table S6.pdf
- Table S7.pdf
- Table S8.pdf
- Table S9.pdf
- Text S1.pdf

The copyright of individual parts of the supplement might differ from the article licence.
