# Supplementary material for: Update of a biogeochemical model with process-based algorithms to predict ammonia volatilization from fertilized cultivated uplands and rice paddy fields
Source: Copernicus journal article supplement (doi:10.5194/bg-19-3001-2022), 2022-06-22
Supplement: Supplementary file 8 [file bg-19-3001-2022-supplement.zip › Fig. S1.pdf]

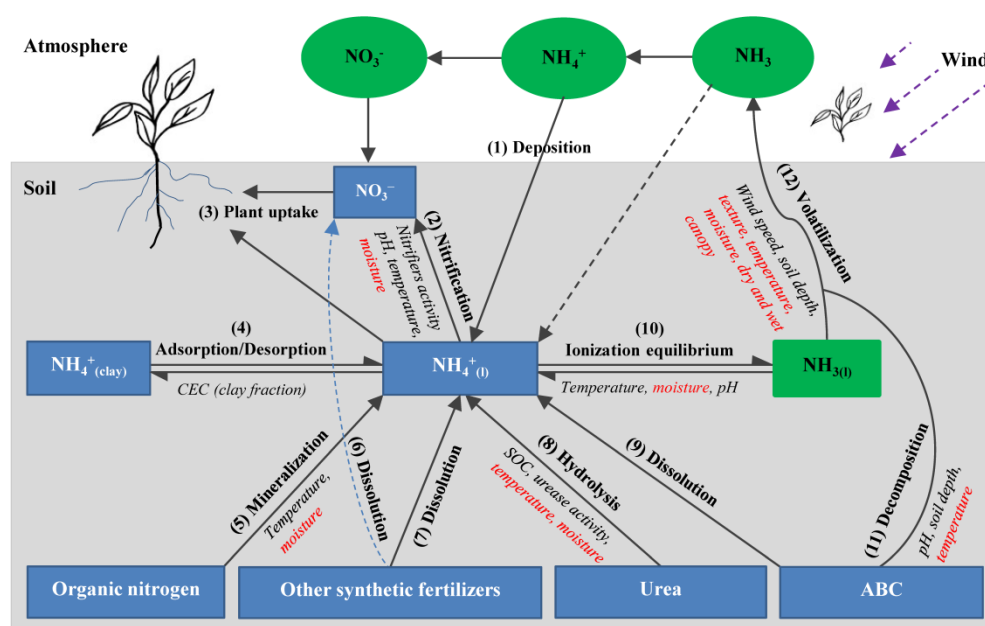

**Fig. S1** CNMM-DNDC model-included processes determining ammonium ( $\text{NH}_4^+$ ), ammonia ( $\text{NH}_3$ ) concentrations in the liquid phase of a soil, and ammonium bicarbonate decomposition (ABC), and thus volatilization of this nitrogenous gas in the uplands. This figure was drawn by decoding the original and revised Catchment Nutrient Management Model - DeNitrification DeComposition (i.e., CNMM-DNDC) model.  $\text{NH}_4^+_{(\text{clay})}$  denotes the  $\text{NH}_4^+$  adsorbed by clay minerals.  $\text{NH}_4^+_{(\text{l})}$  and  $\text{NH}_3_{(\text{l})}$  are referred to as dissolved  $\text{NH}_4^+$  and  $\text{NH}_3$ , respectively, in the liquid phase of a soil. Bold word(s) aside arrow(s) indicate(s) the nitrogen transfer/transformation process(es). Italic word(s) aside arrow(s) is/are the regulating factor(s) for the corresponding process(es). The influencing factors with their parameters/parameterizations/definitions fully inherited from the original DNDC95 (<http://www.dnnc.sr.unh.edu/>) with minor changes by Cui et al. (2014) are shown in black, and those newly added/calibrated in the studies of Dubache et al. (2019) and Li et al. (2019) are displayed in red.

## Reference

- Dubache, G., Li, S., Zheng, X., Zhang, W., Deng, J., 2019. Modeling ammonia volatilization following urea application to winter cereal fields in the United Kingdom by a revised biogeochemical model. *Sci. Total Environ.* 660, 1403–1418. <http://dx.doi.org/10.1016/j.scitotenv.2018.12.407>
- Li, S., Zheng, X., Zhang, W., Han, S., Deng, J., Wang, K., Wang, R., Yao, Z., Liu, C., 2019. Modeling ammonia volatilization following the application of synthetic fertilizers to cultivated uplands with calcareous soils using an improved DNDC biogeochemistry model. *Sci. Total Environ.* 660, 931–946. <http://dx.doi.org/10.1016/j.scitotenv.2018.12.379>
- Cui, F., Zheng, X., Liu, C., Wang, K., Zhou, Z., Deng, J., 2014. Assessing biogeochemical effects and best management practice for a wheat–maize cropping system using the DNDC model. *Biogeosciences* 10, 8561–8609. <http://dx.doi.org/10.5194/bg-11-91-2014>.
