# Supplementary material for: Update of a biogeochemical model with process-based algorithms to predict ammonia volatilization from fertilized cultivated uplands and rice paddy fields
Source: Copernicus journal article supplement (doi:10.5194/bg-19-3001-2022), 2022-06-22
Supplement: Supplementary file 8 [file bg-19-3001-2022-supplement.zip › Fig. S2.pdf]

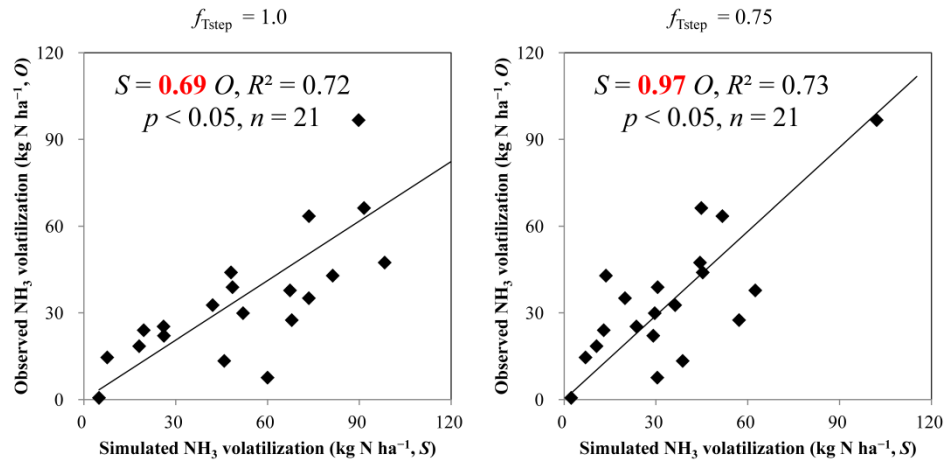

**Fig. S2** Calibration of the time-step parameter ( $f_{\text{Tstep}}$ ).  $n$ ,  $p$  and  $R^2$  denotes the sample size, significant level and coefficient of determination for the zero-intercept linear regression, respectively.
