# Supplementary material for: Update of a biogeochemical model with process-based algorithms to predict ammonia volatilization from fertilized cultivated uplands and rice paddy fields
Source: Copernicus journal article supplement (doi:10.5194/bg-19-3001-2022), 2022-06-22
Supplement: Supplementary file 8 [file bg-19-3001-2022-supplement.zip › Table S1.pdf]

**Table S1** Equations of the direct processes calculating NH<sub>3</sub> volatilization from upland soils in the original and modified CNMM-DNDC model.

| Equations                                                                                                                       | Description                                                  |        |
|---------------------------------------------------------------------------------------------------------------------------------|--------------------------------------------------------------|--------|
| <b><i>Original CNMM-DNDC model</i></b>                                                                                          |                                                              |        |
| <b>Urea hydrolysis</b>                                                                                                          |                                                              |        |
| $d[\text{NH}_4^+]_j/dt = -d[\text{urea}]_j/dt$                                                                                  | Urea hydrolysis rate                                         | Eq. 1  |
| $= f_T f_{\text{SOC}} [\text{urea}]_j$                                                                                          |                                                              |        |
| $f_T = 0.0364e^{0.0805T_{\text{soil}}}$                                                                                         | Effect of soil temperature on urea hydrolysis                | Eq. 2  |
| $f_{\text{SOC}} = 0.01[\text{SOC}]_j^{-1}$                                                                                      | Effect of soil temperature on urea hydrolysis                | Eq. 3  |
| <b>ABC decomposition</b>                                                                                                        |                                                              |        |
| $f_{\text{ABC\_dec}} = f_{\text{pH}} f_{\text{dp}}$                                                                             | ABC decomposition rate                                       | Eq. 4  |
| $f_{\text{pH}} = 0.1\text{pH} - 0.5$                                                                                            | Effect of soil pH on ABC decomposition                       | Eq. 5  |
| $f_{\text{dp}} = 6.0 \times 10^{-3.6735j/q-0.7551}$                                                                             | Effect of soil depth on ABC decomposition                    | Eq. 6  |
| $\text{NH}_3\text{\_flux}(j) = f_{\text{ABC\_dec}} [\text{NH}_4\text{HCO}_3]_j$                                                 | NH <sub>3</sub> volatilization from ABC decomposition        | Eq. 7  |
| <b>NH<sub>3</sub> volatilization</b>                                                                                            |                                                              |        |
| $\text{Flux}(\text{NH}_3)_{\text{upland}(j)} = 0.25 f_{\text{wind}} f_{\text{depth}} f_{\text{temp}} [\text{NH}_3(\text{l})]_j$ | NH <sub>3</sub> flux from uplands                            | Eq. 8  |
| $f_{\text{wind}} = 1.5S_{\text{wind}}/(1.0 + S_{\text{wind}})$                                                                  | Effect of wind speed on NH <sub>3</sub> volatilization       | Eq. 9  |
| $f_{\text{depth}} = (d_s/d_1 - j)/(d_s/d_1)$                                                                                    | Effect of soil depth on NH <sub>3</sub> volatilization       | Eq. 10 |
| $f_{\text{temp}} = T_{\text{soil}}/(50 + T_{\text{soil}})$                                                                      | Effect of soil temperature on NH <sub>3</sub> volatilization | Eq. 11 |
| <b><i>Modified CNMM-DNDC model</i></b>                                                                                          |                                                              |        |
| <b>Urea hydrolysis</b>                                                                                                          |                                                              |        |
| $d[\text{NH}_4^+]_j/dt = -d[\text{urea}]_j/dt$                                                                                  | Urea hydrolysis rate                                         | Eq. 12 |
| $= f_T f_{\text{SOC}} f_{\text{SM}} [\text{urea}]_j$                                                                            |                                                              |        |
| $f_T = 0.45e^{0.025T_{\text{soil}}}$                                                                                            | Effect of soil temperature on urea hydrolysis                | Eq. 13 |

$$f_{SM} = \text{WFPS}/\text{PORE}$$

Effect of soil moisture on urea hydrolysis

Eq. 14

$$f_{SOC} = 0.01[\text{SOC}]_j^{-1}$$

Effect of soil temperature on urea hydrolysis

Eq. 15

### ABC decomposition

$$f_{ABC\_dec} = f_{pH} f_{dp} f_{T\_s\_ABC}$$

ABC decomposition rate

Eq. 16

$$f_{pH} = 0.1\text{pH} - 0.5$$

Effect of soil pH on ABC decomposition

Eq. 17

$$f_{dp} = 6.0 \times 10^{-3.6735j/q-0.7551}$$

Effect of soil depth on ABC decomposition

Eq. 18

$$f_{T\_s\_ABC} = T_{soil}/(30 + T_{soil})$$

Effect of soil temperature on ABC decomposition

Eq. 19

$$\text{NH}_3\_flux(j) = f_{ABC\_dec} [\text{NH}_4\text{HCO}_3]_j$$

NH<sub>3</sub> volatilization from ABC decomposition

Eq. 20

### NH<sub>3</sub> volatilization

$$\begin{aligned} &\text{Flux}(\text{NH}_3)_{\text{upland}(j)} \\ &= 3.6 f_{\text{wind}} f_{\text{depth}} f_{\text{temp}} f_{\text{canopy}} f_{\text{clay}} f_{\text{water}} f_{\text{rain}} [\text{NH}_3(l)]_j \end{aligned}$$

NH<sub>3</sub> flux from uplands

Eq. 21

$$f_{\text{wind}} = 0.1 + 1.5 S_{\text{wind}} / (1 + S_{\text{wind}})$$

Effect of wind speed on NH<sub>3</sub> volatilization

Eq. 22

$$f_{\text{depth}} = 0.5^{d_{\text{soil}}/0.03}$$

Effect of soil depth on NH<sub>3</sub> volatilization

Eq. 23

$$f_{\text{temp}} = 0.1 + 2.0 T_{\text{soil}} / (45 + T_{\text{soil}})$$

Effect of soil temperature on NH<sub>3</sub> volatilization

Eq. 24

$$f_{\text{canopy}} = 0.4e^{-0.15\text{lai}} + 0.6$$

Effect of dry canopy on NH<sub>3</sub> volatilization

Eq. 25

$$f_{\text{clay}} = e^{-0.06\text{cl}}$$

Effect of soil clay content on NH<sub>3</sub> volatilization

Eq. 26

$$f_{\text{water}} = 0.45e^{-10\text{WFPS}_j/\text{PORE}} + 0.55$$

Effect of soil moisture on NH<sub>3</sub> volatilization

Eq. 27

$$f_{\text{rain}} = 0.65e^{-1.0\text{lai}P} + 0.35$$

Effect of rain wetting canopy on NH<sub>3</sub> volatilization

Eq. 28

---
